# Supplementary material for: Visual detection of multiple genetically modified organisms in a capillary array
Source: Royal Society of Chemistry journal article supplement (doi:10.1039/c6lc01330a), 2017-01-01
Supplement: c6lc01330a2.pdf [file c6lc01330a2.pdf]

# Visual Detection of Multiple Genetically Modified Organisms in a Capillary Array

*Ning Shao,<sup>a,c,d,†</sup> Jianwei Chen,<sup>a,c,d,†</sup> Jiaying Hu,<sup>b,†</sup> Rong Li,<sup>b</sup> Dabing Zhang,<sup>b</sup> Shujuan Guo,<sup>a,c,d</sup> Junhou Hui,<sup>e</sup> Peng Liu,<sup>e</sup> Litao Yang<sup>b,\*</sup> and Shengce Tao<sup>a,c,d,\*</sup>*

<sup>a</sup>Shanghai Center for Systems Biomedicine, Key Laboratory of Systems Biomedicine (Ministry of Education), Shanghai Jiao Tong University, Shanghai 200240, China.

<sup>b</sup>Collaborative Innovation center for biosafety of GMOs, National Center for the Molecular Characterization of Genetically Modified Organisms, School of Life Sciences and Biotechnology, Shanghai Jiao Tong University, Shanghai 200240, China.

<sup>c</sup>State Key Laboratory of Oncogenes and Related Genes, Shanghai 200240, China.

<sup>d</sup>School of Biomedical Engineering, Shanghai Jiao Tong University, Shanghai 200240, China.

<sup>e</sup>Department of Biomedical Engineering, Collaborative Innovation Center for Diagnosis and Treatment of Infectious Diseases, School of Medicine, Tsinghua University, Beijing 100084, China.

<sup>†</sup>These authors contributed equally to this work.

\*To whom correspondence should be addressed to L.-T. Y. (yyltt@gmail.com) and S.-C. T. (taosc@sjtu.edu.cn).

# Supplementary Materials list

## 1. Supplementary Figures

**Supplementary Figure 1.** The hydrophobic coating of the capillary array is necessary to successful sample loading and separation.

**Supplementary Figure 2.** CALM is also compatible to large sample screening in 96-well microplate format.

**Supplementary Figure 3.** Successful amplification on CALM platform without cross-contamination.

**Supplementary Figure 4.** Sensitivity of the conventional LAMP for the eight targets.

## 2. Supplementary Tables

**Supplementary Table 1.** List of LAMP primer sequences.

**Supplementary Table 2.** Data analysis of the LAMP array experiments.

**Supplementary Table 3.** List of primers and Taqman probes of the real-time PCR assays.

**Supplementary Table 4.** The Ct values of the real-time PCR assays for the SHCIQ samples.
