# Supplementary material for: Visual detection of multiple genetically modified organisms in a capillary array
Source: Royal Society of Chemistry journal article supplement (doi:10.1039/c6lc01330a), 2017-01-01
Supplement: c6lc01330a3.xlsx [file c6lc01330a3.xlsx]

## Sheet: Table S1
Supplementary Table 1. List of LAMP primer sequences.
ID	Target	Name	Primers (5'--3')	References
1	P-CaMV35S	FIP (F1c-F2)	TGCTGAAGTCCCTGGAGGCACA-GTTGGGCAGCCCGATG	reference 1
		BIP (B1c-B2)	TGGCGGGGGGAGACGTACA-GGGTCCCTGGAAGGCA
		Loop F	GAGATATCATATCAATCCACTTGCTTTGAAGA
		Loop B	ATATAAGGAAGTTCATTTCATTTGGAGAGG
		F3	GAGATATCATATCAATCCACTTGCTTTGAAGA
		B3	ATATAAGGAAGTTCATTTCATTTGGAGAGG
2	bar	FIP (F1c-F2)	TGCTGAAGTCCCTGGAGGCACA-GTTGGGCAGCCCGATG
		BIP (B1c-B2)	TGGCGGGGGGAGACGTACA-GGGTCCCTGGAAGGCA
		Loop F	GGGCTTCAAGAGCGTGGTCGCTGT
		Loop B	CGGTTGACTCGGCCGTCCAGTCGTAGGCGTTGCG
		F3	TGCATGCGCACGCTC
		B3	AGGTGGACGGCGAGGT
3	CP4 epsps	FIP (F1c-F2)	AGCAGAACAGCGGACTTCACTT-CCAACGCCAATCACCTACA
		BIP (B1c-B2)	ACACCCCAGGTATCACCACTGT-GCACCAAAACCTTGAAGCAT
		Loop F	GAGCGGAAGCCATAGGTACCC
		Loop B	TATCGAGCCAATCATGACTCGTGACCACACTGAAAAG
		F3	CTTGCGTGGACCAAAGACT
		B3	ACACCGTCAGCATCAGTCT
4	P-FMV35S	FIP (F1c-F2)	GCTGGAACAGTAGTTTACTTTG-ACCATTAGCCAAAAGCTACA
		BIP (B1c-B2)	ACATGCATGGTCAGT-AAGATTACTTTCAAAGATGCCCAC
		Loop F	ATTGAAGATTCTTCATTGATCTCC
		Loop B	GTTTCAGAAAAAGACATCCACCGAAGACTTAAAGTTA
		F3	GTCAGGGTACAGAGTCTCC
		B3	GCTGCTCGATGTTGACAA
5	pat	FIP (F1c-F2)	TACCCCGGGCTGTGTATCCC-ATAGGCCTTCCAAACGATCC
		BIP (B1c-B2)	ATTGCGCGCAGCTGGATACAA-GGAGGAGCTGGCAACTCA
		Loop F	AAGCCTCATGCAACCTAACAGAT
		Loop B	GCATGGTGGATGGCATGATGTTGGTTTTTGGCAAAGGGA
		F3	GGCGCAAGGTTTTAAGTCTG
		B3	GGTAACTGGCCTAACTGGC
6	T-NOS	FIP (F1c-F2)	AGATGGGTTTTTATGATTAGA-TTTATCCTAGTTTGCGC
		BIP (B1c-B2)	TAATTCAACAGAAATTATATG-AAGTTTCTTAAGATTGAATCCTG
		Loop F	AGTCCCGCAATTATACATTTAATACGCGATAGAAAACAAAATATA
		Loop B	ATAATCATCGCAAGACCGGCAA
		F3	CATAGATGACACCGCG
		B3	GATCGTTCAAACATTTGG
7	NptII	FIP (F1c-F2)	TAGCCGGATCAAGCGTATGC-TCATCTCACCTTGCTCCT	reference 2
		BIP (B1c-B2)	CCATTCGACCACCAAGCGA-CATCCTGATCGACAAGACC
		Loop F	TTGCATCAGCCATGATGGATA
		Loop B	CGTACTCGGATGGAAGCC
		F3	CTCGACGTTGTCACTGAAG
		B3	TGATGCTCTTCGTCCAGA
8	ADH1	FIP (F1c-F2)	CCCCTCCGCAAATCTTCGAACAG-TTT-TGTAACTGGTGAAGGACTGAG	reference 3
		BIP (B1c-B2)	GGTGATCAAGTGCAAAGGTCT-TTT-CATAAACCAAGATTAGTCAGATCAAG
		Loop F	CGCCTTGTTTCTCCTCTGTC
		Loop B	CCAAATCATCCACTCCGAGAC
		F3	CTTTGGATCGATTGGTTTC
		B3	CCCAAAATTACTCAACG
9	Sad1	FIP (F1c-F2)	AGAAAGTGTTTGAGATGTACCTTGC-CTTCGTGGGAAAAGTGGTG
		BIP (B1c-B2)	ACTGTTGTCTTGGAAAAAACACATG-TTTGTAAGCCCCTCAGCT
		Loop F	TTGATTTAACTGTCCAACTTGCAT
		Loop B	AACCCTTTTTCAGTTCTGAAGTG
		F3	GAGAGAGGTGGGTTGTG
		B3	TGAGTATTAATGCCAACTTTGG
10	SPS	FIP (F1c-F2)	CCGCTTTTCGTCGATCTCTAATTTG-GAAAACGAGTGAATTAACCAATGC
		BIP (B1c-B2)	CCTGAACGGATATCTTTCAGTTTGT-CGGTTGATCTTTTCGGGATG
		Loop F	TCCCAATGTAGTACTTGCAGTACCA
		Loop B	GATGACGCACGGACGGCTC
		F3	CGTTTCATAATAGTGTTTTGGGAA
		B3	ACGGTGGTCTCGTGCTC
11	HMG I/Y	FIP (F1c-F2)	GGCCGGACTGTTTCATCTGGT-CTACCACCGTCTCACATGAC
		BIP (B1c-B2)	GTGAAGAACAACTACATGAAACCAG-GAGGCTTCGCCTTCGGA
		Loop F	GAGGTGGTAGCTGAGGAG
		Loop B	CCGCAAGCTCCGCCCAAG
		F3	CGAGTCAACTCAAACCTCT
		B3	GTGGCTTGACTCTCCCT
12	Lectin	FIP (F1c-F2)	GCCCATCTGCAAGCCTTTT-CGCCGCTTCCTTCAACTTC
		BIP (B1c-B2)	TTCTCGCACCAATTGACACTAAG-ACCAGACTCGTTTTCGTTG
		Loop F	GTGTCAGGGGCATAGAAGGT
		Loop B	CCACAAACACATGCAGGTTATCT
		F3	AGAAACCGGTAGCGTTG
		B3	AAGTGTCAAACTCAACAGC
	Underscored bases of the LAMP primers are additional foreign nucleotides
	Reference 1	Wang, C.; Li, R.; Quan, S.; Shen, P.; Zhang, D.; Shi, J.; Yang, L. Analytical and bioanalytical chemistry 2015, 407, 4829.
	Reference 2	Feng, J.; Tang, S.; Liu, L.; Kuang, X.; Wang, X.; Hu, S.; You, S. International journal of food sciences and nutrition 2015, 66, 186.
	Reference 3	Kiddle, G.; Hardinge, P.; Buttigieg, N.; Gandelman, O.; Pereira, C.; McElgunn, C. J.; Rizzoli, M.; Jackson, R.; Appleton, N.; Moore, C.; Tisi, L. C.; Murray, J. A. BMC biotechnology 2012, 12, 15.
