# Supplementary material for: Visual detection of multiple genetically modified organisms in a capillary array
Source: Royal Society of Chemistry journal article supplement (doi:10.1039/c6lc01330a), 2017-01-01
Supplement: c6lc01330a4.xlsx [file c6lc01330a4.xlsx]

## Sheet: Specificity
Supplementary Table 2. Data analysis of the LAMP array experiments
Sample		GM Mix1		GM Mix2		GM Mix3		GM Mix4		GM Mix5		MON863		MON89034		DAS-59122-7		MON88913		T1C-19		NG Maize1		NG Maize2		NG Maize2		NTC
ID	Target	F532 Mean	SNR	F532 Mean	SNR	F532 Mean	SNR	F532 Mean	SNR	F532 Mean	SNR	F532 Mean	SNR	F532 Mean	SNR	F532 Mean	SNR	F532 Mean	SNR	F532 Mean	SNR	F532 Mean	SNR	F532 Mean	SNR	F532 Mean	SNR	F532 Mean	SNR
1	P-CaMV35S	22838	2.61589	45849	3.72771	39544	3.13941	36076	3.00671	41937	2.99775	25424	2.66793	21574	2.48434	27873	3.0687	41869	3.11213	35297	3.12681	8150	0.70183	18301	1.62944	18685	1.60207	6736	0.901982
2	bar	19394	2.22141	43746	3.55673	37334	2.96396	33872	2.82302	37465	2.67808	11956	1.25463	8949	1.03052	12225	1.34592	19811	1.47255	45085	3.99389	9167	0.789408	20791	1.85113	17270	1.48075	6082	0.814408
3	CP4 epsps	26663	3.05401	40213	3.26948	41213	3.27191	33857	2.82177	36879	2.63619	12127	1.27257	12141	1.39809	10912	1.20137	36169	2.68845	15220	1.34827	10208	0.879053	15262	1.35886	17256	1.47955	6153	0.823915
4	P-FMV35S	25152	2.88093	36282	2.94988	39884	3.1664	33101	2.75876	36743	2.62647	12237	1.28412	20983	2.41628	11688	1.2868	43030	3.19842	14277	1.26474	9477	0.816103	14550	1.29546	16040	1.37529	6639	0.888993
5	pat	22643	2.59355	30421	2.47335	33834	2.68609	31774	2.64816	33707	2.40945	13197	1.38486	10810	1.24482	31669	3.48662	21150	1.57208	15266	1.35235	9083	0.782174	13629	1.21346	19938	1.70951	6254	0.83744
6	T-NOS	29243	3.34952	30407	2.47221	29438	2.33709	26975	2.2482	29809	2.13081	23465	2.46235	21740	2.50345	10548	1.16129	14405	1.07073	14394	1.2751	11053	0.951819	11903	1.05979	13458	1.15391	6807	0.911489
7	NptII	23986	2.74738	34803	2.82963	35747	2.83796	28200	2.35029	36818	2.63183	23514	2.4675	12337	1.42066	10824	1.19168	15599	1.15948	11654	1.03238	14605	1.2577	12254	1.09104	13157	1.1281	6987	0.935592
8A	ADH1	23804	2.72653	——	——	——	——	——	——	——	——	29760	3.12293	18572	2.13865	25539	2.81174	——	——	——	——	33297	2.86734	——	——	——	——	7520	1.00696
8B	Sad1	——	——	32253	2.6223	——	——	——	——	——	——	——	——	——	——	——	——	30937	2.29955	——	——	——	——	12193	1.08561	——	——	——	——
8C	SPS	——	——	——	——	31570	2.50635	——	——	——	——	——	——	——	——	——	——	——	——	37683	3.33818	——	——	——	——	12178	1.04416	——	——
8D	HMG I/Y	——	——	——	——	——	——	14319	1.1934	——	——	——	——	——	——	——	——	——	——	——	——	——	——	——	——	——	——	——	——
8E	Lectin	——	——	——	——	——	——	——	——	13757	0.98338	——	——	——	——	——	——	——	——	——	——	——	——	——	——	——	——	——	——
9	NTC	8463	0.96936	12835	1.04354	12408	0.985075	12630	1.05263	13978	0.999178	9308	0.976756	8685	1.00012	8667	0.9542	13464	1.00078	11594	1.02706	12120	1.0437	10857	0.966656	12064	1.03438	7657	1.02531
10	NTC	8998	1.03064	11764	0.956462	12784	1.01493	11367	0.947368	14001	1.00082	9751	1.02324	8683	0.999885	9499	1.0458	13443	0.99922	10983	0.945791	11105	0.956297	11606	1.03334	11262	0.965618	7279	0.974692
SNR was calculated as ratio of F532 mean value to average F532 mean value of the two NTCs. SNR>2 determined a positive result, which was marked in green.

## Sheet: Sensitivity
Sample		MON89034 50 cps		MON89034 25 cps		MON89034 10 cps		MON89034 5 cps		MON89034 0 cps		MON863 50 cps		MON863 25 cps		MON863 10 cps		MON863 5 cps		MON863 0 cps
ID	Target	F532 Mean	SNR	F532 Mean	SNR	F532 Mean	SNR	F532 Mean	SNR	F532 Mean	SNR	F532 Mean	SNR	F532 Mean	SNR	F532 Mean	SNR	F532 Mean	SNR	F532 Mean	SNR
1	P-CaMV35S	27628	2.06025	26901	2.34013	30718	2.0726	13569	0.918065	7724	0.854945	43551	3.44767	25049	2.09554	27801	2.8438	20852	2.04311	14736	0.957443
2	bar	10598	0.790306	13015	1.13218	11943	0.805816	10455	0.707375	9055	1.00227	12202	0.965959	8890	0.743715	12099	1.23762	9485	0.929355	13355	0.867715
3	CP4 epsps	13364	0.99657	10671	0.928276	11528	0.777815	10390	0.702977	8278	0.916265	16307	1.29093	11732	0.98147	15881	1.62449	8999	0.881736	13997	0.909428
4	P-FMV35S	27334	2.03833	29722	2.58553	16072	1.08441	11918	0.80636	8820	0.976258	14182	1.1227	9667	0.808717	14053	1.4375	10186	0.99804	12873	0.836398
5	pat	10291	0.767412	10487	0.91227	12306	0.830308	15035	1.01725	10542	1.16686	14983	1.18611	7741	0.647593	9249	0.946092	12913	1.26524	10880	0.706907
6	T-NOS	28486	2.12424	35189	3.06111	13664	0.921935	12255	0.829161	8883	0.983231	32068	2.53863	13026	1.08972	12856	1.31506	8638	0.846365	12840	0.834254
7	NptII	12402	0.924832	11570	1.00648	14440	0.974293	13421	0.908051	9368	1.03691	34293	2.71477	31640	2.64692	28381	2.90313	30106	2.94983	13349	0.867325
8	ADH1	29764	2.21954	35534	3.09112	36169	2.44039	31747	2.14797	9881	1.0937	35177	2.78475	25648	2.14565	27504	2.81342	23114	2.26475	13081	0.849912
9	NTC	13012	0.970321	11930	1.0378	15061	1.01619	13433	0.908863	8296	0.918258	13287	1.05185	11308	0.945999	11403	1.16643	9834	0.963551	15229	0.989474
10	NTC	13808	1.02968	11061	0.962203	14581	0.983807	16127	1.09114	9773	1.08174	11977	0.948148	12599	1.054	8149	0.833572	10578	1.03645	15553	1.01053

## Sheet: Practical Sample
Sample		M1		M2		M3		C2		S4
ID	Target	F532 Mean	SNR	F532 Mean	SNR	F532 Mean	SNR	F532 Mean	SNR	F532 Mean	SNR
1	P-CaMV35S	42774	3.11843	39103	2.95675	32745	2.57967	6421	1.14121	31394	2.75108
2	bar	13643	0.994641	11673	0.882647	10812	0.851775	17469	3.10477	11696	1.02493
3	CP4 epsps	19411	1.41516	18036	1.36378	14909	1.17454	12335	2.1923	36619	3.20896
4	P-FMV35S	38348	2.79576	35057	2.65081	35084	2.76393	15662	2.78361	28385	2.4874
5	pat	32764	2.38866	29309	2.21618	28528	2.24745	7022	1.24802	23387	2.04942
6	T-NOS	34664	2.52718	26538	2.00665	29446	2.31977	12371	2.1987	38925	3.41103
7	NptII	13676	0.997047	14203	1.07395	12595	0.99224	16054	2.85328	13511	1.18398
8A	ADH1	29587	2.15704	32195	2.4344	25994	2.04782	——	——	——	——
8D	HMG I/Y	——	——	——	——	——	——	19742	3.50875
8E	Lectin	——	——	——	——	——	——	——	——	25812	2.26193
9	NTC	14260	1.03962	14429	1.09104	13951	1.09907	5101	0.906603	11728	1.02774
10	NTC	13173	0.960376	12021	0.90896	11436	0.900934	6152	1.0934	11095	0.972265
