# Supplementary material for: Visual detection of multiple genetically modified organisms in a capillary array
Source: Royal Society of Chemistry journal article supplement (doi:10.1039/c6lc01330a), 2017-01-01
Supplement: c6lc01330a5.xlsx [file c6lc01330a5.xlsx]

## Sheet: Table S3
Supplementary Table 3. List of primers and Taqman probes of the real-time PCR assays.
ID	Target	Name	Primers and probes (5'--3')	Amplicon (bp)
1	P-CaMV35S	Forward	CGACAGTGGTCCCAAAGA	74
		Reverse	AAGACGTGGTTGGAACGTCTTC
		Probe	FAM-TGGACCCCCACCCACGAGGAGCATC-TAMRA
2	bar	Forward	ACAAGCACGGTCAACTTCC	60
		Reverse	GAGGTCGTCCGTCCACTC
		Probe	FAM-TACCGAGCCGCAGGAACC-BQ1
3	CP4 epsps	Forward	CACCGCATCGCCATGA	103
		Reverse	CCATGAACTCCGGGAAGCT
		Probe	FAM-TTCCTCGTCATGGGCCTCGTGTC-BQ1
4	P-FMV35S	Forward	CCAAAAGCTACAGGAGATCAATGA	101
		Reverse	CGGTGGATGTCTTTTTCTGAAAC
		Probe	FAM-CTGTTCCAGCACATGCATCATGGTCA-BQ1
5	pat	Forward	TTGAGGGTGTTGTGGCTGGTA	68
		Reverse	TGTCCAATCGTAAGCGTTCCT
		Probe	FAM-CTTCCAGGGCCCAGCGTAAGCA-BQ1
6	T-NOS	Forward	ATCGTTCAAACATTTGGCA	165
		Reverse	ATTGCGGGACTCTAATCATA
		Probe	FAM-CATCGCAAGACCGGCAACAGG-TAMRA
7	NptII	Forward	CTATGACTGGGCACAACAGACA	95
		Reverse	CGGACAGGTCGGTCTTGACA
		Probe	FAM-CTGCTCTGATGCCGCCGTGTTCCG-BQ1
8	ADH1	Forward	CGTCGTTTCCCATCTCTTCCTCC	135
		Reverse	CCACTCCGAGACCCTCAGTC
		Probe	FAM-AATCAGGGCTCATTTTCTCGCTCCTCA-TAMRA
9	Sad1	Forward	CCAAAGGAGGTGCCTGTTCA	107
		Reverse	TTGAGGTGAGTCAGAATGTTGTTC
		Probe	HEX-TCACCCACTCCATGCCGCCTCACA-TAMRA
10	SPS	Forward	TTGCGCCTGAACGGATAT	81
		Reverse	CGGTTGATCTTTTCGGGATG
		Probe	TCCGAGCCGTCCGTGCGTC
11	HMG I/Y	Forward	TTGGACTAGAAATCTCGTGCTGA	79
		Reverse	GCTACATAGGGAGCCTTGTCCT
		Probe	FAM-CAATCCACACAAACGCACGCGTA-TAMRA
12	Lectin	Forward	GCCCTCTACTCCACCCCCA	118
		Reverse	GCCCATCTGCAAGCCTTTTT
		Probe	FAM-AGCTTCGCCGCTTCCTTCAACTTCAC-TAMRA
