# Supplementary material for: Visual detection of multiple genetically modified organisms in a capillary array
Source: Royal Society of Chemistry journal article supplement (doi:10.1039/c6lc01330a), 2017-01-01
Supplement: c6lc01330a6.xlsx [file c6lc01330a6.xlsx]

## Sheet: Table S4
Supplementary Table 4. The Ct values of the real-time PCR assays for the SHCIQ samples.
Target	Repeat	Ct values
		Maize 1	Maize 2	Maize 3	Canola 2	Soybean 4	NTC
P-CaMV35s	1	28.833	29.9402	28.2419	ND	28.2287	ND
	2	28.9262	29.4029	28.0511	ND	28.3012	ND
	3	28.6319	29.8379	28.0529	ND	28.9684	ND
	Mean	28.7971	29.727	28.1153	ND	28.4994	ND
	SD	0.150414	0.285295	0.109629	ND	0.407766	ND
	CV	0.00522326	0.00959717	0.00389928	ND	0.0143079	ND
bar	1	ND	ND	ND	24.2041	ND	ND
	2	ND	ND	ND	23.8814	ND	ND
	3	ND	ND	ND	24.1111	ND	ND
	Mean	ND	ND	ND	24.0655	ND	ND
	SD	ND	ND	ND	0.166099	ND	ND
	CV	ND	ND	ND	0.00690194	ND	ND
cp4 epsps	1	ND	ND	ND	ND	28.1017	ND
	2	ND	ND	ND	ND	27.3982	ND
	3	ND	ND	ND	ND	28.2677	ND
	Mean	ND	ND	ND	ND	27.9225	ND
	SD	ND	ND	ND	ND	0.461625	ND
	CV	ND	ND	ND	ND	0.0165323	ND
FMV-35S	1	28.3483	29.335	28.5682	22.7342	27.8042	ND
	2	28.4136	28.9871	28.7746	22.3857	27.9227	ND
	3	28.474	28.8052	28.8625	22.6001	28.2273	ND
	Mean	28.412	29.0424	28.7351	22.5733	27.9848	ND
	SD	0.0628958	0.269198	0.151101	0.175793	0.21826	ND
	CV	0.00221371	0.00926914	0.0052584	0.00778767	0.00779925	ND
Pat	1	27.6012	27.7128	27.5449	ND	32.4703	ND
	2	27.4902	27.9372	28.3906	ND	32.5114	ND
	3	27.8357	28.6731	28.3814	ND	32.4018	ND
	Mean	27.6424	28.1077	28.1057	ND	32.4611	ND
	SD	0.176365	0.502345	0.48564	ND	0.0553754	ND
	CV	0.00638025	0.0178722	0.0172791	ND	0.0017059	ND
T-nos	1	27.7462	28.4825	28.4127	24.4634	26.8003	ND
	2	27.9382	28.3048	28.6533	23.8481	26.5419	ND
	3	27.7652	28.3075	28.4211	24.0516	26.5811	ND
	Mean	9.30965	9.66757	9.63854	24.4634	8.95245	ND
	SD	0.105789	0.101816	0.136534	0.313457	0.139251	ND
	CV	0.0113634	0.0105317	0.0141654	0.0128133	0.0155545	ND
nptII	1	ND	ND	ND	30.0556	ND	ND
	2	ND	ND	ND	30.1327	ND	ND
	3	ND	ND	ND	30.1017	ND	ND
	Mean	ND	ND	ND	10.1273	ND	ND
	SD	ND	ND	ND	0.038792	ND	ND
	CV	ND	ND	ND	0.00383045	ND	ND
ADH1	1	28.8258	29.3822	29.3609	ND	ND	ND
	2	28.8404	29.3743	29.2316	ND	ND	ND
	3	28.4329	29.1071	28.6081	ND	ND	ND
	Mean	28.8258	29.3822	29.3609	ND	ND	ND
	SD	0.231175	0.156572	0.402524	ND	ND	ND
	CV	0.00801973	0.00532881	0.0137095	ND	ND	ND
HMG I/Y	1	ND	ND	ND	27.15	ND	ND
	2	ND	ND	ND	27.38	ND	ND
	3	ND	ND	ND	27.1	ND	ND
	Mean	ND	ND	ND	27.15	ND	ND
	SD	ND	ND	ND	0.149332	ND	ND
	CV	ND	ND	ND	0.00550025	ND	ND
Lectin	1	ND	ND	ND	ND	31.1	ND
	2	ND	ND	ND	ND	31.65	ND
	3	ND	ND	ND	ND	31.63	ND
	Mean	ND	ND	ND	ND	31.1	ND
	SD	ND	ND	ND	ND	0.311929	ND
	CV	ND	ND	ND	ND	0.0100299	ND
Ct: threshold cycle
SD: standard deviation
CV: coefficient of variation
